# Supplementary material for: Structural diversity, magnetic properties, and luminescence sensing based Ni(ii)/Zn(ii) coordination polymers of the semirigid 3,3′-((5-carboxy-1,3-phenylene)bis(oxy))dibenzate ligand
Source: Royal Society of Chemistry journal article supplement (doi:10.1039/c9ce01998g), 2020-01-01
Supplement: c9ce01998g1.pdf [file c9ce01998g1.pdf]

## Supporting Information

### Structural Diversity, Magnetic Properties, or Luminescent Sensing Based Ni(II)/Zn(II) Coordination Polymers of the semirigid ligand of 3,3'-((5-carboxy-1,3-phenylene)bis(oxy))dibenzate

Dong-Dong Yang<sup>a</sup>, Li-Ping Lu<sup>\*a</sup>, Miao-Li Zhu<sup>\*a, b</sup>

<sup>a</sup> Institute of Molecular Science, Key Laboratory of Chemical Biology and Molecular Engineering of the Education Ministry, Shanxi University, Taiyuan, Shanxi 030006, People's Republic of China.

[luliping@sxu.edu.cn](mailto:luliping@sxu.edu.cn). <sup>b</sup> Key Laboratory of Materials for Energy Conversion and Storage of Shanxi Province; Shanxi University, Taiyuan, Shanxi 030006, People's Republic of China.

[miaoli@sxu.edu.cn](mailto:miaoli@sxu.edu.cn)

#### Contents

**Fig. S1** ESI mass spectra of H<sub>3</sub>cpboda ligand

**Fig. S2** The IR spectra of H<sub>3</sub>cpboda ligand and complexes **1-4**

**Fig. S3** The thermal curves of complexes **1-4**

**Fig. S4** The solid-state emission spectra of **2** and **4** as well as H<sub>3</sub>cpboda at room temperature

**Fig. S5** The luminescence intensities of complexes **2** and **4**, which were dispersed in the aqueous solution of different anions.

**Fig S6** Luminescence responses of **2** and **4** toward different concentrations of Cr<sub>2</sub>O<sub>7</sub><sup>2-</sup>/ CrO<sub>4</sub><sup>2-</sup> in water, and Stern–Volmer plot of I<sub>0</sub>/I versus Cr<sub>2</sub>O<sub>7</sub><sup>2-</sup>/ CrO<sub>4</sub><sup>2-</sup> concentration in an aqueous suspension of **2** and **4**.

**Fig. S7** Linear region of fluorescence intensity suspensions in water upon incremental addition of Cr<sub>2</sub>O<sub>7</sub><sup>2-</sup>/ CrO<sub>4</sub><sup>2-</sup> in complexes **2** and **4**.

**Fig. S8** (a) Interference study of **2** and **4** for Cr<sub>2</sub>O<sub>7</sub><sup>2-</sup>/ CrO<sub>4</sub><sup>2-</sup> anions in the presence of different anions.

**Fig. S9** The luminescence intensity of complexes **2** and **4** for the recognition of Cr<sub>2</sub>O<sub>7</sub><sup>2-</sup>/ CrO<sub>4</sub><sup>2-</sup> in **2** and **4**, CrO<sub>4</sub><sup>2-</sup> after five recycling processes.

**Fig. S10** The PXRD patterns of simulated complexes **2** and **4**, the PXRD patterns of five cycle tests of **2** and **4** sense Cr<sub>2</sub>O<sub>7</sub><sup>2-</sup> and CrO<sub>4</sub><sup>2-</sup> anions.

**Fig.S11** Liquid UV-vis spectra of complexes **2** and **4**, Cr<sub>2</sub>O<sub>7</sub><sup>2-</sup> and CrO<sub>4</sub><sup>2-</sup> in the aqueous solution.

**Fig. S12** Liquid UV-vis spectra of complexes **2**, **4** and anions in the aqueous solution

**Fig. S13** HOMO and LUMO energies (eV) for the complex **4**, Cr<sub>2</sub>O<sub>7</sub><sup>2-</sup> and CrO<sub>4</sub><sup>2-</sup>

**Table S1** Crystal data and structure refinement for complexes **1 – 4**

**Table S2** Comparison of various CPs sensors for the detection of Cr(VI).

**Tables S3.** Selected bond lengths [Å] and angles [°] for complexes **1-4**.

**Tables S4.** Hydrogen bonds in crystal packing [Å, °] of complexes **1, 2** and **4**.

**Table S5** LOD calculations for Cr<sub>2</sub>O<sub>7</sub><sup>2-</sup> and CrO<sub>4</sub><sup>2-</sup>

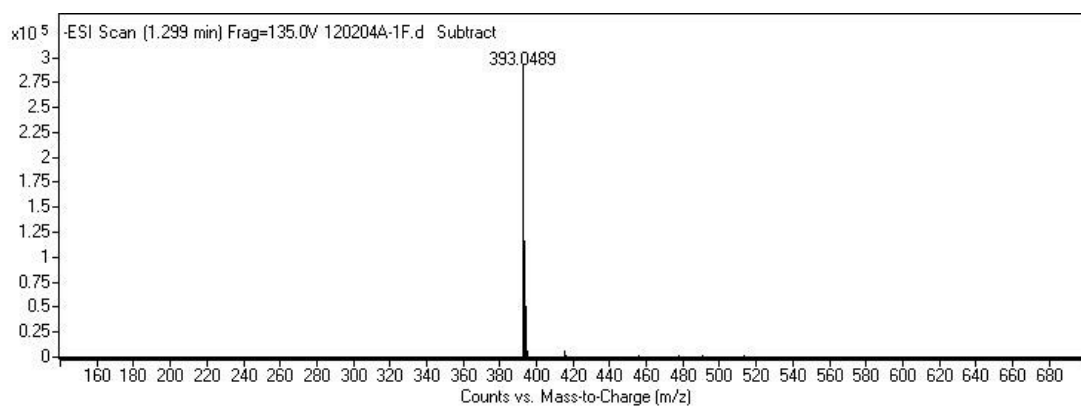

Fig. S1 ESI mass spectra of H<sub>3</sub>cpboda ligand

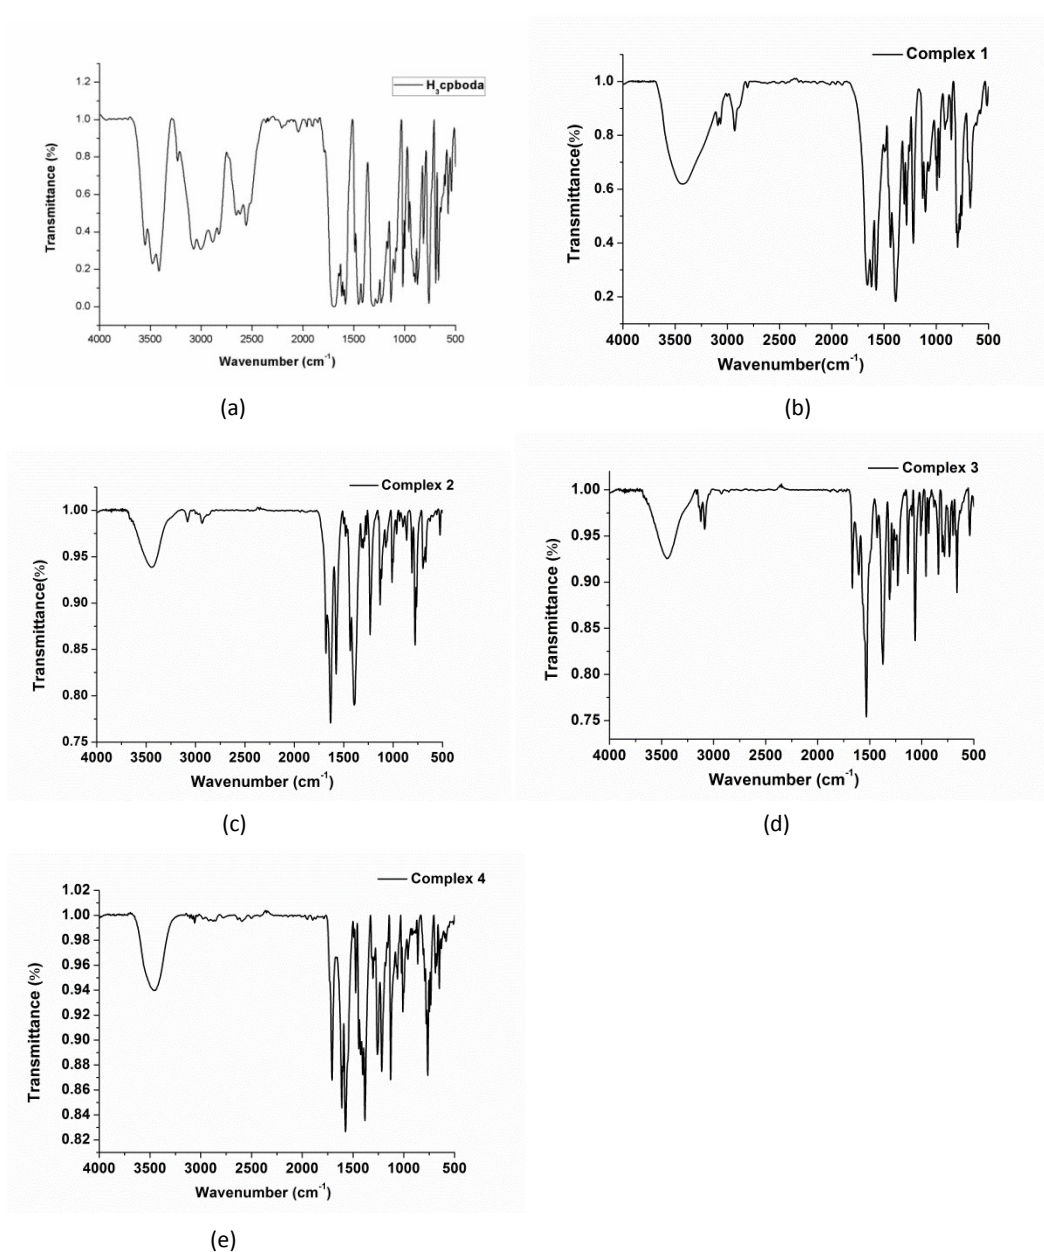

Fig. S2 The IR spectra of H<sub>3</sub>cpboda ligand and complexes 1-4

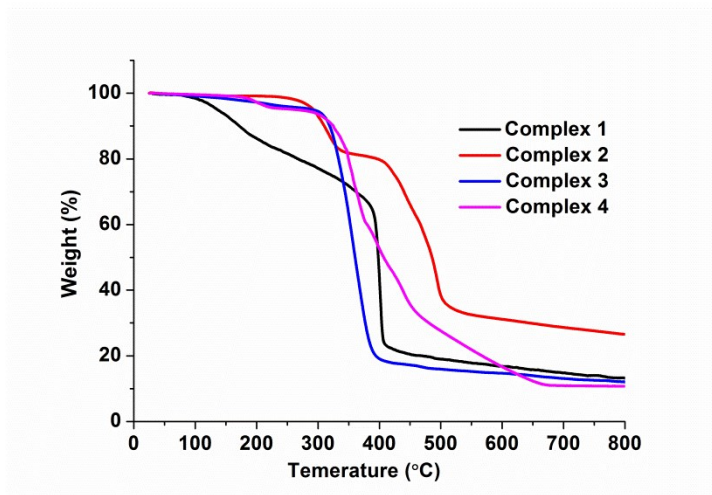

Fig. S3 The thermal curves of complexes 1-4.

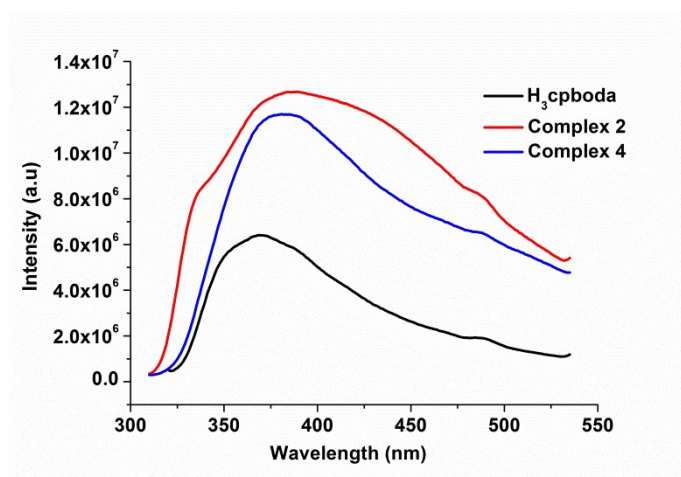

Fig. S4 The solid-state emission spectra of 2 and 4 as well as  $H_3cpboda$  at room temperature

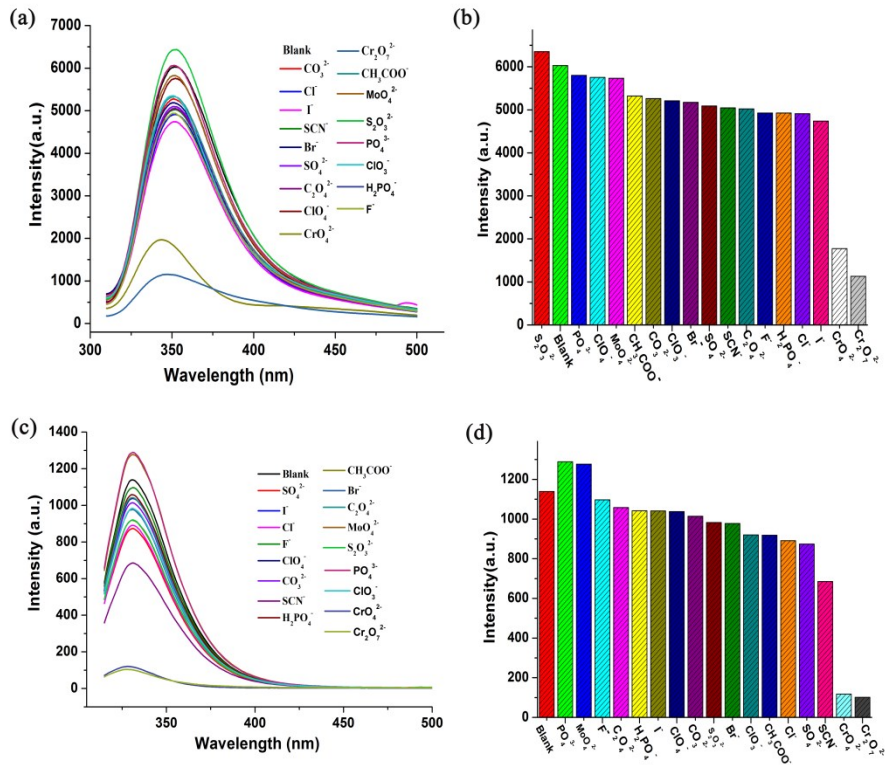

Fig. S5 The luminescence intensities of complexes 2 (a) and (b), 4 (c) and (d), which were dispersed in the aqueous solution of different anions.

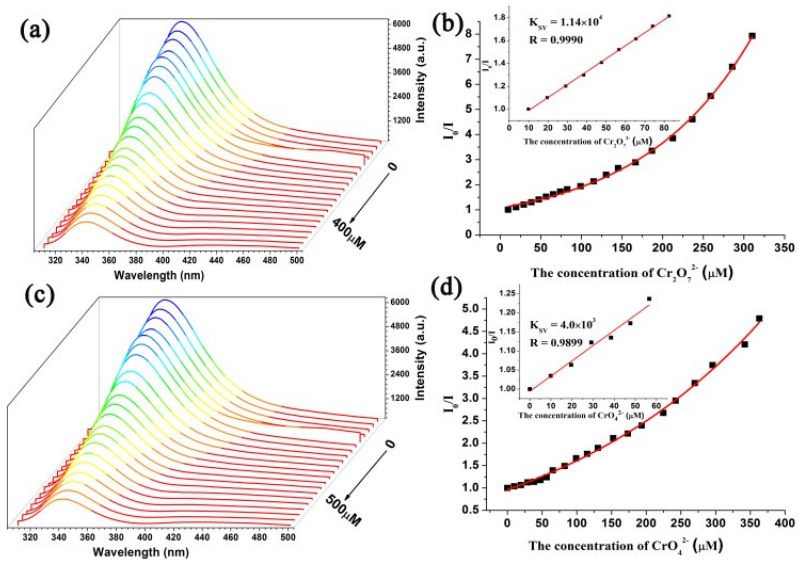

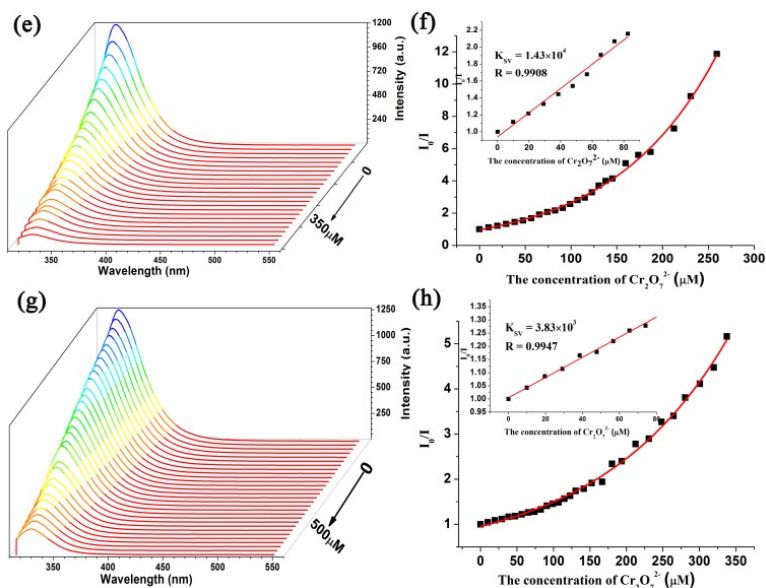

**Fig S6** (a) Luminescence responses of **2** (2.00 mg dispersed in 2.00 mL of water) toward different concentrations of  $\text{Cr}_2\text{O}_7^{2-}$  in water, (b) Luminescence responses of **2** toward different concentrations of  $\text{CrO}_4^{2-}$  in water, (c) Luminescence responses of **4** (2.00 mg dispersed in 2.00 mL of water) toward different concentrations of  $\text{Cr}_2\text{O}_7^{2-}$  in water, luminescence responses of **4** toward different concentrations of  $\text{CrO}_4^{2-}$  in water, (d) Stern–Volmer plot of  $I_0/I$  versus  $\text{Cr}_2\text{O}_7^{2-}$  concentration in an aqueous suspension of **2**. (e) Stern–Volmer plot of  $I_0/I$  versus  $\text{CrO}_4^{2-}$  concentration in an aqueous suspension of **2**. (f) Stern–Volmer plot of  $I_0/I$  versus  $\text{Cr}_2\text{O}_7^{2-}$  concentration in an aqueous suspension of **4**. (g) Stern–Volmer plot of  $I_0/I$  versus  $\text{CrO}_4^{2-}$  concentration in an aqueous suspension of **4**.

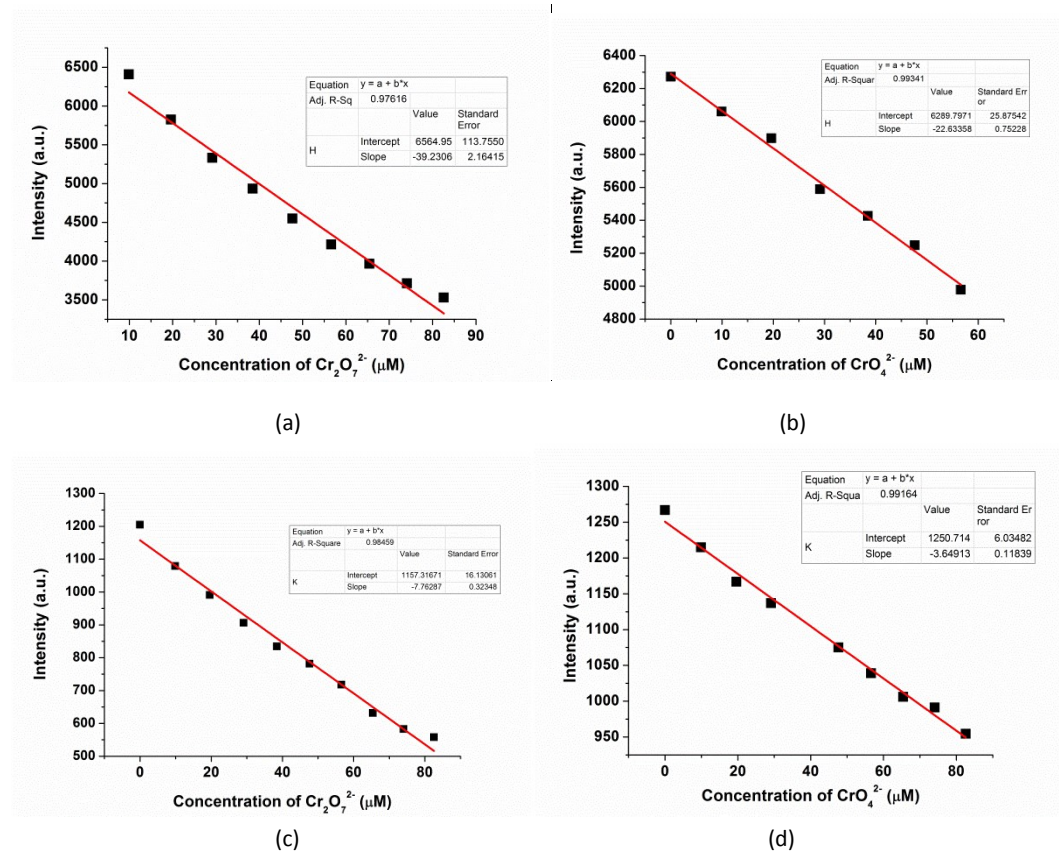

**Fig. S7** Linear region of fluorescence intensity suspensions in water upon incremental addition of  $\text{Cr}_2\text{O}_7^{2-}$  (a) and



CrO<sub>4</sub><sup>2-</sup> (b) in complex **2**, Cr<sub>2</sub>O<sub>7</sub><sup>2-</sup> (c) and CrO<sub>4</sub><sup>2-</sup> (d) in complex **4**.

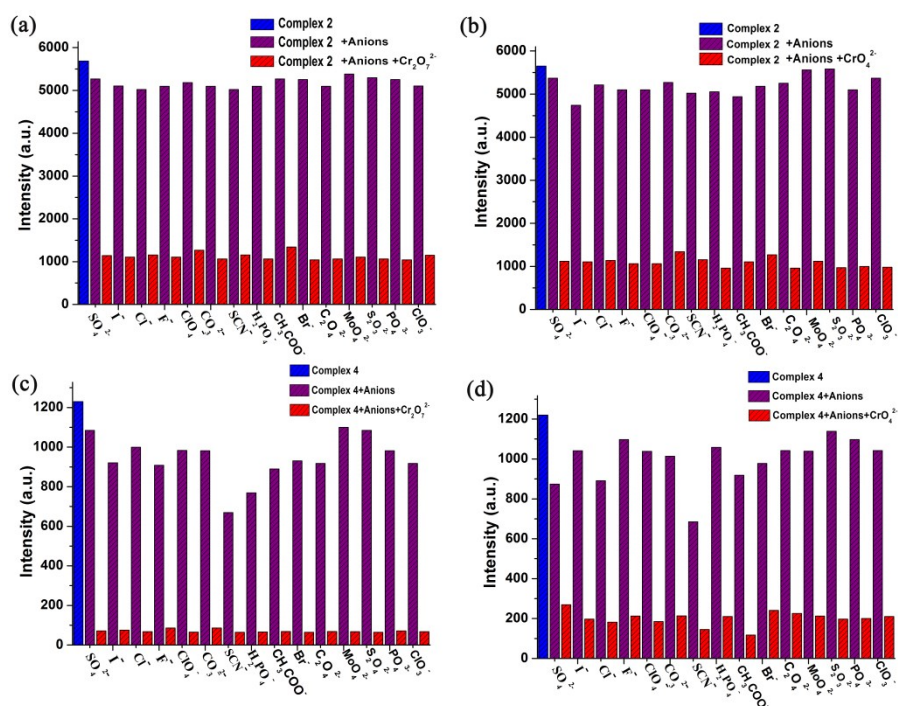

**Fig. S8** (a) Interference study of **2** for Cr<sub>2</sub>O<sub>7</sub><sup>2-</sup> anions in the presence of different anions. (b) Interference study of **2** for CrO<sub>4</sub><sup>2-</sup> anions in the presence of different anions. (c) Interference study of **4** for Cr<sub>2</sub>O<sub>7</sub><sup>2-</sup> anions in the presence of different anions. (d) Interference study of **4** for CrO<sub>4</sub><sup>2-</sup> anions in the presence of different anions.

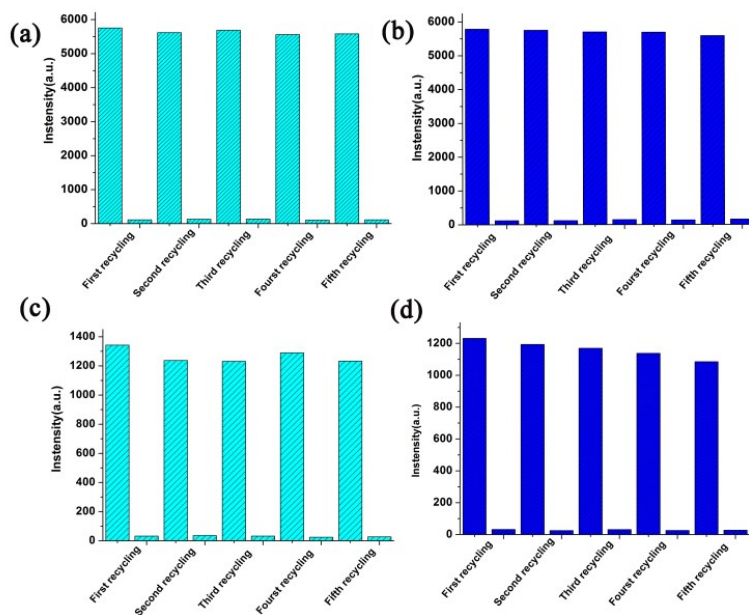

**Fig. S9** The luminescence intensity of complexes **2** and **4** for the recognition of Cr<sub>2</sub>O<sub>7</sub><sup>2-</sup> (a) in **2**, (c) in **4**, CrO<sub>4</sub><sup>2-</sup> (b) in **2**, (d) in **4**, after five recycling processes.

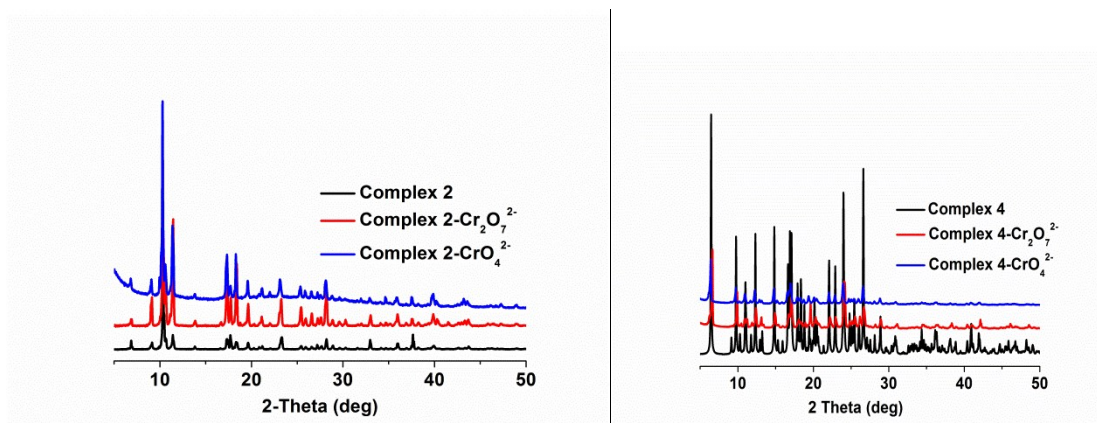

(a)

(b)

Fig. S10 The PXRD patterns of simulated complexes **2** and **4**, the PXRD patterns of five cycle tests of **2** and **4** sense  $\text{Cr}_2\text{O}_7^{2-}$  and  $\text{CrO}_4^{2-}$  anions.

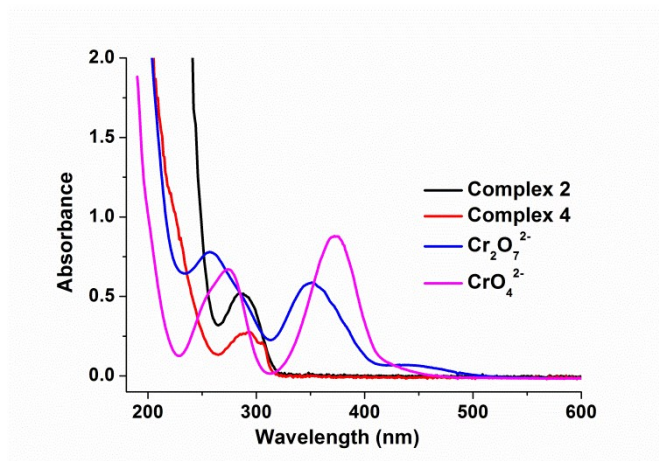

Fig.S11 Liquid UV-vis spectra of complexes **2** and **4**,  $\text{Cr}_2\text{O}_7^{2-}$  and  $\text{CrO}_4^{2-}$  in the aqueous solution.

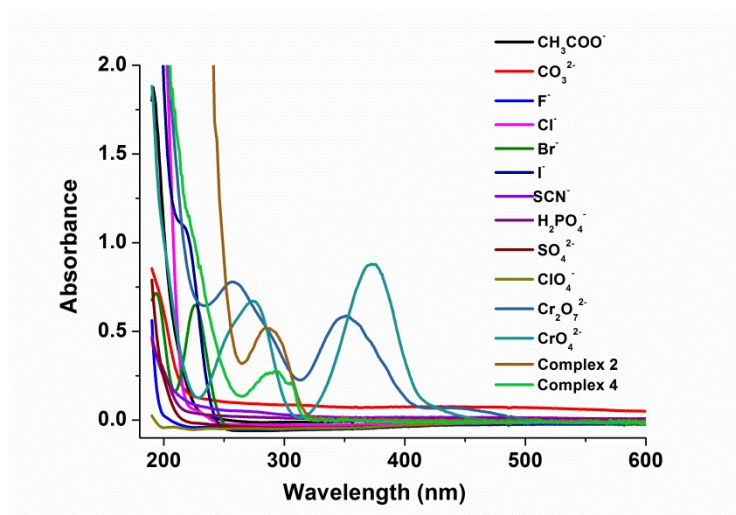

Fig. S12 Liquid UV-vis spectra of complexes **2**, **4** and anions in the aqueous solution

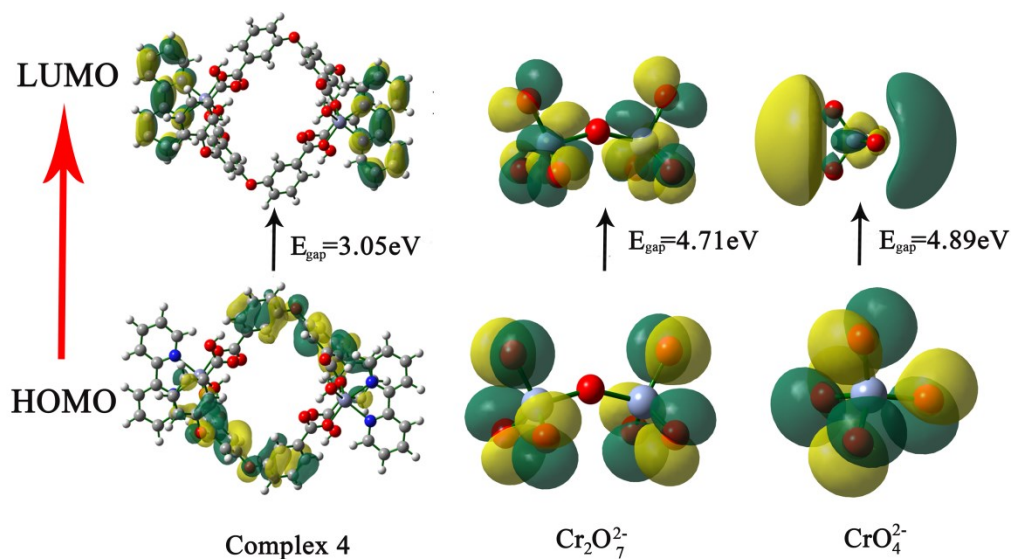

Fig. S13 HOMO and LUMO energies (eV) for the complex 4,  $\text{Cr}_2\text{O}_7^{2-}$  and  $\text{CrO}_4^{2-}$ .

Table S1 Crystal data and structure refinement for complexes 1 – 4

|                           | 1                                                                                                                                                               | 2                                                                                                                                                               | 3                                                                  | 4                                                              |
|---------------------------|-----------------------------------------------------------------------------------------------------------------------------------------------------------------|-----------------------------------------------------------------------------------------------------------------------------------------------------------------|--------------------------------------------------------------------|----------------------------------------------------------------|
| CCDC                      | 1955193                                                                                                                                                         | 1955196                                                                                                                                                         | 1955195                                                            | 1955194                                                        |
| Formula                   | $\text{C}_{54}\text{H}_{58}\text{N}_4\text{Ni}_3\text{O}_{24}[\text{+solvent}=(\text{C}_3\text{H}_7\text{NO})\cdot 2(\text{HCOOH})\cdot 2(\text{H}_2\text{O})]$ | $\text{C}_{54}\text{H}_{58}\text{N}_4\text{Zn}_3\text{O}_{24}[\text{+solvent}=(\text{C}_3\text{H}_7\text{NO})\cdot 3(\text{HCOOH})\cdot 3(\text{H}_2\text{O})]$ | $\text{C}_{105}\text{H}_{83}\text{N}_{21}\text{Ni}_3\text{O}_{19}$ | $\text{C}_{62}\text{H}_{44}\text{N}_4\text{O}_{18}\text{Zn}_2$ |
| $M_r$                     | 1524.35                                                                                                                                                         | 1608.37                                                                                                                                                         | 2119.05                                                            | 1263.75                                                        |
| Crystal system            | Monoclinic                                                                                                                                                      | Monoclinic                                                                                                                                                      | Triclinic                                                          | Triclinic                                                      |
| space group               | $C2/c$                                                                                                                                                          | $C2/c$                                                                                                                                                          |                                                                    |                                                                |
| Temperature(K)            | 296 (2)                                                                                                                                                         | 300(2)                                                                                                                                                          | 296 (2)                                                            | 300(2)                                                         |
| Size                      | 0.25×0.20×0.15                                                                                                                                                  | 0.20×0.20×0.10                                                                                                                                                  | 0.20×0.15×0.10                                                     | 0.25×0.25×0.20                                                 |
| $a$ (Å)                   | 26.838 (8)                                                                                                                                                      | 26.833 (3)                                                                                                                                                      | 13.4660 (6)                                                        | 10.0734 (3)                                                    |
| $b$ (Å)                   | 16.004 (4)                                                                                                                                                      | 16.3490 (18)                                                                                                                                                    | 13.6070 (6)                                                        | 10.7439 (3)                                                    |
| $c$ (Å)                   | 19.922 (6)                                                                                                                                                      | 20.321 (2)                                                                                                                                                      | 13.7158 (6)                                                        | 13.9706 (4)                                                    |
| $\alpha$ (°)              | 90                                                                                                                                                              | 90                                                                                                                                                              | 97.812 (2)                                                         | 80.340 (1)                                                     |
| $\beta$ (°)               | 128.187 (6)                                                                                                                                                     | 130.554 (3)                                                                                                                                                     | 103.166 (2)                                                        | 79.996 (1)                                                     |
| $\gamma$ (°)              | 90                                                                                                                                                              | 90                                                                                                                                                              | 94.058 (2)                                                         | 64.717 (1)                                                     |
| $V$ (Å <sup>3</sup> )     | 6727 (4)                                                                                                                                                        | 6773.3 (13)                                                                                                                                                     | 2410.88 (19)                                                       | 1338.92 (7)                                                    |
| $Z$                       | 4                                                                                                                                                               | 4                                                                                                                                                               | 1                                                                  | 1                                                              |
| $D_x/\text{Mg m}^{-3}$    | 1.505                                                                                                                                                           | 1.577                                                                                                                                                           | 1.460                                                              | 1.567                                                          |
| $\mu$ (mm <sup>-1</sup> ) | 0.92                                                                                                                                                            | 1.15                                                                                                                                                            | 0.66                                                               | 0.98                                                           |
| $R_{\text{int}}$          | 0.068                                                                                                                                                           | 0.038                                                                                                                                                           | 0.035                                                              | 0.039                                                          |
| GOF                       | 1.02                                                                                                                                                            | 1.04                                                                                                                                                            | 1.00                                                               | 1.07                                                           |



|                                         |        |        |        |       |
|-----------------------------------------|--------|--------|--------|-------|
| $F_{000}$                               | 3176.0 | 3336.0 | 1096.0 | 648.0 |
| $R_1 [I > 2\sigma(I)]$                  | 0.057  | 0.076  | 0.057  | 0.049 |
| $wR_2 [I > 2\sigma(I)]$                 | 0.154  | 0.276  | 0.150  | 0.104 |
| $\Delta\rho_{\max}$ (eÅ <sup>-3</sup> ) | 0.52   | 1.65   | 0.73   | 0.55  |
| $\Delta\rho_{\min}$ (eÅ <sup>-3</sup> ) | -0.40  | -0.185 | -0.93  | -0.66 |

**Table S2** Comparison of various CPs sensors for the detection of Cr(VI).

|   | CPs-based fluorescent Materials                                                                                                                                                         | Analyte                                                                         | Quenching constant (K <sub>sv</sub> , M <sup>-1</sup> ) | Detection Limits (LOD, μM) | Media | Ref.             |
|---|-----------------------------------------------------------------------------------------------------------------------------------------------------------------------------------------|---------------------------------------------------------------------------------|---------------------------------------------------------|----------------------------|-------|------------------|
| 1 | {[Zn <sub>2</sub> (TPOM)(NH <sub>2</sub> -BDC) <sub>2</sub> ·4H <sub>2</sub> O] <sub>n</sub> }                                                                                          | (Cr <sub>2</sub> O <sub>7</sub> <sup>2-</sup> /CrO <sub>4</sub> <sup>2-</sup> ) | 7.59×10 <sup>3</sup> , 4.45×10 <sup>3</sup>             | 3.9/4.8                    | DMF   | <b>S1</b>        |
|   | [Zn(btz)] <sub>n</sub>                                                                                                                                                                  | (Cr <sub>2</sub> O <sub>7</sub> <sup>2-</sup> /CrO <sub>4</sub> <sup>2-</sup> ) | 4.23×10 <sup>3</sup> , 3.19×10 <sup>3</sup>             | 2/10                       | water |                  |
| 2 | [Zn(ttz)H <sub>2</sub> O] <sub>n</sub>                                                                                                                                                  | (Cr <sub>2</sub> O <sub>7</sub> <sup>2-</sup> /CrO <sub>4</sub> <sup>2-</sup> ) | 2.19×10 <sup>3</sup> , 2.35×10 <sup>3</sup>             | 2/20                       | water | <b>S2</b>        |
| 3 | [Zn <sub>2</sub> (TPOM)(NH <sub>2</sub> -BDC) <sub>2</sub> ·4H <sub>2</sub> O]                                                                                                          | (Cr <sub>2</sub> O <sub>7</sub> <sup>2-</sup> /CrO <sub>4</sub> <sup>2-</sup> ) | 7.59×10 <sup>3</sup> , 4.45×10 <sup>3</sup>             | 3.9/4.8                    | DMF   | <b>S3</b>        |
| 4 | Eu(CBIP)(HCOO)(H <sub>2</sub> O) <sub>n</sub>                                                                                                                                           | (Cr <sub>2</sub> O <sub>7</sub> <sup>2-</sup> /CrO <sub>4</sub> <sup>2-</sup> ) | 2.76×10 <sup>3</sup> , 1.54×10 <sup>3</sup>             | 1.0/1.2                    | water | <b>S4</b>        |
|   | [Cd(μ <sub>3</sub> -Hcpboda)(1,4-bib)] <sub>n</sub>                                                                                                                                     | (Cr <sub>2</sub> O <sub>7</sub> <sup>2-</sup> /CrO <sub>4</sub> <sup>2-</sup> ) | 1.62×10 <sup>4</sup> , 7.61×10 <sup>3</sup>             | 2.29/3.91                  | water |                  |
| 5 | {[Cd <sub>3</sub> (μ <sub>4</sub> -cpboda) <sub>2</sub> (μ <sub>1,1</sub> -OH <sub>2</sub> ) <sub>2</sub> (phen) <sub>2</sub> ·2DMF·1.5H <sub>2</sub> O] <sub>n</sub> }                 | (Cr <sub>2</sub> O <sub>7</sub> <sup>2-</sup> /CrO <sub>4</sub> <sup>2-</sup> ) | 1.38×10 <sup>4</sup> , 1.43×10 <sup>4</sup>             | 4.27/4.4                   | water | <b>S5</b>        |
| 6 | [Cd(4-tpvb)(5-tert-BIPA)] <sub>n</sub>                                                                                                                                                  | (Cr <sub>2</sub> O <sub>7</sub> <sup>2-</sup> /CrO <sub>4</sub> <sup>2-</sup> ) | 2.5×10 <sup>4</sup> , 4.78×10 <sup>4</sup>              | 0.12/0.08                  | water | <b>S6</b>        |
| 7 | [Zn(μ <sub>3</sub> -Hcpota)(phen)] <sub>n</sub> ·nH <sub>2</sub> O                                                                                                                      | (Cr <sub>2</sub> O <sub>7</sub> <sup>2-</sup> /CrO <sub>4</sub> <sup>2-</sup> ) | 1×10 <sup>4</sup> , 3.51×10 <sup>3</sup>                | 3.62/8.06                  | water | <b>S7</b>        |
|   | [Zn(IPA)(L)] <sub>n</sub>                                                                                                                                                               | (Cr <sub>2</sub> O <sub>7</sub> <sup>2-</sup> /CrO <sub>4</sub> <sup>2-</sup> ) | 1.37×10 <sup>3</sup> , 1.0×10 <sup>3</sup>              | 12.0/18.3                  | water |                  |
| 8 | [Cd(IPA)(L)] <sub>n</sub>                                                                                                                                                               | (Cr <sub>2</sub> O <sub>7</sub> <sup>2-</sup> /CrO <sub>4</sub> <sup>2-</sup> ) | 2.91×10 <sup>3</sup> , 1.20×10 <sup>3</sup>             | 2.26/2.52                  | water | <b>S8</b>        |
|   | {[Zn <sub>3</sub> (μ <sub>4</sub> -cpboda) <sub>2</sub> (μ <sub>2</sub> -H <sub>2</sub> O) <sub>2</sub> (DMF) <sub>2</sub> (H <sub>2</sub> O) <sub>2</sub> ·3DMF·4HCOOH] <sub>n</sub> } | (Cr <sub>2</sub> O <sub>7</sub> <sup>2-</sup> /CrO <sub>4</sub> <sup>2-</sup> ) | 1.14×10 <sup>4</sup> , 4.0×10 <sup>3</sup>              | 1.73/3.12                  | water | <b>This work</b> |
|   | [Zn(Hcpboda)(2,2bipy)(H <sub>2</sub> O)] <sub>n</sub>                                                                                                                                   | (Cr <sub>2</sub> O <sub>7</sub> <sup>2-</sup> /CrO <sub>4</sub> <sup>2-</sup> ) | 1.40×10 <sup>4</sup> , 3.83×10 <sup>3</sup>             | 3.04/5.33                  | water |                  |

**Tables S3.** Selected bond lengths [Å] and angles [°] for complexes 1-4.

**Complex 1**

|                        |            |                                      |            |
|------------------------|------------|--------------------------------------|------------|
| Ni1—O6                 | 2.023 (3)  | Ni2—O5                               | 2.025 (3)  |
| Ni1—O6 <sup>i</sup>    | 2.023 (3)  | Ni2—O1                               | 2.029 (4)  |
| Ni1—O2                 | 2.033 (3)  | Ni2—O10                              | 2.053 (4)  |
| Ni1—O2 <sup>i</sup>    | 2.033 (3)  | Ni2—O11                              | 2.046 (3)  |
| Ni1—O9                 | 2.095 (3)  | Ni2—O9                               | 2.072 (3)  |
| Ni1—O9 <sup>i</sup>    | 2.095 (3)  | Ni2—O7                               | 2.079 (3)  |
| O6—Ni1—O6 <sup>i</sup> | 180.0      | O2—Ni1—O9 <sup>i</sup>               | 88.45 (13) |
| O6—Ni1—O2              | 90.98 (13) | O2 <sup>i</sup> —Ni1—O9 <sup>i</sup> | 91.55 (13) |

|                                      |             |                        |             |
|--------------------------------------|-------------|------------------------|-------------|
| O6 <sup>i</sup> —Ni1—O2              | 89.02 (13)  | O9—Ni1—O9 <sup>i</sup> | 180.0       |
| O6—Ni1—O2 <sup>i</sup>               | 89.02 (13)  | O5—Ni2—O1              | 94.51 (15)  |
| O6 <sup>i</sup> —Ni1—O2 <sup>i</sup> | 90.98 (13)  | O5—Ni2—O10             | 89.34 (17)  |
| O2—Ni1—O2 <sup>i</sup>               | 180.00 (9)  | O1—Ni2—O10             | 173.23 (15) |
| O6—Ni1—O9                            | 95.04 (13)  | O5—Ni2—O11             | 85.40 (13)  |
| O6 <sup>i</sup> —Ni1—O9              | 84.96 (13)  | O1—Ni2—O11             | 88.44 (13)  |
| O2—Ni1—O9                            | 91.55 (13)  | O10—Ni2—O11            | 86.32 (15)  |
| O2 <sup>i</sup> —Ni1—O9              | 88.45 (13)  | O5—Ni2—O9              | 91.38 (13)  |
| O6—Ni1—O9 <sup>i</sup>               | 84.96 (13)  | O1—Ni2—O9              | 94.71 (13)  |
| O6 <sup>i</sup> —Ni1—O9 <sup>i</sup> | 95.04 (13)  | O10—Ni2—O9             | 90.76 (14)  |
| O11—Ni2—O7                           | 91.65 (13)  | O11—Ni2—O9             | 175.67 (12) |
| O9—Ni2—O7                            | 91.57 (12)  | O5—Ni2—O7              | 177.05 (13) |
| O10—Ni2—O7                           | 90.63 (16)  | O1—Ni2—O7              | 85.24 (14)  |
| Ni2—O9—Ni1                           | 113.16 (14) |                        |             |

Complex 2

|                                      |             |             |             |
|--------------------------------------|-------------|-------------|-------------|
| Zn1—O6                               | 2.1305 (16) | Zn2—O1      | 2.134 (2)   |
| Zn1—O6 <sup>i</sup>                  | 2.1306 (16) | Zn2—O11     | 2.1535 (19) |
| Zn1—O2                               | 2.1467 (17) | Zn2—O5      | 2.1680 (18) |
| Zn1—O2 <sup>i</sup>                  | 2.1468 (17) | Zn2—O7      | 2.192 (2)   |
| Zn1—O9 <sup>i</sup>                  | 2.2627 (17) | Zn2—O10     | 2.182 (2)   |
| Zn1—O9                               | 2.2628 (17) | Zn2—O9      | 2.2514 (15) |
| O6—Zn1—O6 <sup>i</sup>               | 180.0       | O1—Zn2—O11  | 88.15 (8)   |
| O6—Zn1—O2                            | 91.34 (8)   | O1—Zn2—O5   | 94.55 (8)   |
| O6 <sup>i</sup> —Zn1—O2              | 88.66 (8)   | O11—Zn2—O5  | 87.46 (8)   |
| O6—Zn1—O2 <sup>i</sup>               | 88.66 (8)   | O1—Zn2—O7   | 84.73 (10)  |
| O6 <sup>i</sup> —Zn1—O2 <sup>i</sup> | 91.34 (8)   | O11—Zn2—O7  | 94.20 (8)   |
| O2—Zn1—O2 <sup>i</sup>               | 180.00 (5)  | O5—Zn2—O7   | 178.16 (8)  |
| O6—Zn1—O9 <sup>i</sup>               | 87.54 (7)   | O1—Zn2—O10  | 170.10 (9)  |
| O6 <sup>i</sup> —Zn1—O9 <sup>i</sup> | 92.46 (7)   | O11—Zn2—O10 | 87.06 (8)   |
| O2—Zn1—O9 <sup>i</sup>               | 89.49 (7)   | O5—Zn2—O10  | 93.89 (8)   |
| O2 <sup>i</sup> —Zn1—O9 <sup>i</sup> | 90.51 (7)   | O7—Zn2—O10  | 86.99 (9)   |
| O6—Zn1—O9                            | 92.46 (7)   | O1—Zn2—O9   | 94.12 (7)   |

|                         |           |            |            |
|-------------------------|-----------|------------|------------|
| O6 <sup>i</sup> —Zn1—O9 | 87.54 (6) | O11—Zn2—O9 | 177.20 (7) |
| O2—Zn1—O9               | 90.51 (7) | O5—Zn2—O9  | 90.72 (7)  |
| O2 <sup>i</sup> —Zn1—O9 | 89.49 (7) | O7—Zn2—O9  | 87.65 (7)  |
| O9 <sup>i</sup> —Zn1—O9 | 180.0     | O10—Zn2—O9 | 90.95 (7)  |

Complex 3

|                                         |             |                                        |             |
|-----------------------------------------|-------------|----------------------------------------|-------------|
| Ni1—N4i                                 | 2.0809 (18) | Ni2—N9                                 | 2.0399 (17) |
| Ni1—N8ii                                | 2.0987 (16) | Ni2—N9 <sup>iv</sup>                   | 2.0399 (17) |
| Ni1—O9iii                               | 2.1045 (15) | Ni2—O7                                 | 2.0902 (15) |
| Ni1—N1                                  | 2.1047 (17) | Ni2—O7 <sup>iv</sup>                   | 2.0903 (15) |
| Ni1—N5                                  | 2.1054 (16) | Ni2—O5                                 | 2.0974 (15) |
| Ni1—O1                                  | 2.1431 (15) | Ni2—O5 <sup>iv</sup>                   | 2.0974 (15) |
| N4 <sup>i</sup> —Ni1—N8 <sup>ii</sup>   | 90.62 (7)   | N4 <sup>i</sup> —Ni1—O1                | 86.64 (7)   |
| N4 <sup>i</sup> —Ni1—O9 <sup>iii</sup>  | 98.92 (7)   | N8 <sup>ii</sup> —Ni1—O1               | 87.25 (6)   |
| N8 <sup>ii</sup> —Ni1—O9 <sup>iii</sup> | 94.57 (6)   | O9 <sup>iii</sup> —Ni1—O1              | 174.12 (6)  |
| N4 <sup>i</sup> —Ni1—N1                 | 175.34 (7)  | N1—Ni1—O1                              | 88.80 (7)   |
| N8 <sup>ii</sup> —Ni1—N1                | 88.21 (7)   | N5—Ni1—O1                              | 93.18 (6)   |
| O9 <sup>iii</sup> —Ni1—N1               | 85.67 (7)   | N9—Ni2—N9 <sup>iv</sup>                | 180.0       |
| N4 <sup>i</sup> —Ni1—N5                 | 87.48 (7)   | N9—Ni2—O7                              | 87.72 (7)   |
| N8 <sup>ii</sup> —Ni1—N5                | 178.03 (7)  | N9 <sup>iv</sup> —Ni2—O7               | 92.27 (7)   |
| O9 <sup>iii</sup> —Ni1—N5               | 85.18 (7)   | N9—Ni2—O7 <sup>iv</sup>                | 92.27 (7)   |
| N1—Ni1—N5                               | 93.73 (7)   | N9 <sup>iv</sup> —Ni2—O7 <sup>iv</sup> | 87.73 (7)   |
| O7—Ni2—O7 <sup>iv</sup>                 | 180.0       | N9—Ni2—O5 <sup>iv</sup>                | 91.57 (7)   |
| N9—Ni2—O5                               | 88.43 (7)   | N9 <sup>iv</sup> —Ni2—O5 <sup>iv</sup> | 88.44 (7)   |
| N9 <sup>iv</sup> —Ni2—O5                | 91.57 (7)   | O7—Ni2—O5 <sup>iv</sup>                | 89.41 (6)   |
| O7—Ni2—O5                               | 90.60 (6)   | O7 <sup>iv</sup> —Ni2—O5 <sup>iv</sup> | 90.60 (6)   |
| O7 <sup>iv</sup> —Ni2—O5                | 89.40 (6)   | O5—Ni2—O5 <sup>iv</sup>                | 180.0       |

Complex 4

|                         |           |           |            |
|-------------------------|-----------|-----------|------------|
| Zn1—O7 <sup>i</sup>     | 1.994 (2) | Zn1—N2    | 2.115 (2)  |
| Zn1—O9                  | 2.039 (2) | Zn1—N1    | 2.159 (2)  |
| Zn1—O3                  | 2.050 (2) |           |            |
| O7 <sup>i</sup> —Zn1—O9 | 94.23 (9) | O3—Zn1—N2 | 104.52 (9) |

|                         |            |                         |             |
|-------------------------|------------|-------------------------|-------------|
| O7 <sup>i</sup> —Zn1—O3 | 95.15 (10) | O7 <sup>i</sup> —Zn1—N1 | 170.31 (10) |
| O9—Zn1—O3               | 139.75 (9) | O9—Zn1—N1               | 86.21 (9)   |
| O7 <sup>i</sup> —Zn1—N2 | 94.41 (10) | O3—Zn1—N1               | 90.70 (9)   |
| O9—Zn1—N2               | 113.65 (9) | N2—Zn1—N1               | 76.61 (10)  |

Symmetry codes: for complex 1: (i)  $-x+1/2, -y+1/2, -z+1$ ; (ii)  $x, -y, z-1/2$ ; (iii)  $x, -y, z+1/2$ .

For complex 2: (i)  $-x+1/2, -y+1/2, -z+1$ ; (ii)  $x, -y, z-1/2$ ; (iii)  $x, -y, z+1/2$ . For complex 3:

(i)  $x, y+1, z$ ; (ii)  $x, y, z-1$ ; (iii)  $-x+1, -y+1, -z$ ; (iv)  $-x, -y, -z-1$ ; (v)  $-x-1, -y, -z-1$ ; (vi)  $-x, -y+1, -z+1$ ; (vii)  $x, y-1, z$ ; (viii)  $x, y, z+1$ . For complex 4: (i)  $-x+2, -y, -z+1$ .

**Tables S4.** Hydrogen bonds in crystal packing [ $\text{\AA}$ ,  $^\circ$ ] of complexes **1**, **2** and **4**.

Complex 1

| $D-H\cdots A$                           | $D-H$ | $H\cdots A$ | $D\cdots A$ | $D-H\cdots A$ |
|-----------------------------------------|-------|-------------|-------------|---------------|
| O10—<br>H10B $\cdots$ O12               | 0.82  | 2.17        | 2.923 (11)  | 154           |
| O10—<br>H10A $\cdots$ O10 <sup>ii</sup> | 0.82  | 2.56        | 3.062 (14)  | 121           |
| O9—H9B $\cdots$ O12                     | 0.82  | 2.04        | 2.691 (11)  | 136           |
| O9—H9B $\cdots$ O2 <sup>i</sup>         | 0.82  | 2.40        | 2.891 (8)   | 120           |
| O9—H9A $\cdots$ O8                      | 0.82  | 1.78        | 2.518 (8)   | 148           |

Complex 3

|                                 |      |      |           |     |
|---------------------------------|------|------|-----------|-----|
| O7—H7A $\cdots$ O6              | 0.82 | 1.86 | 2.586 (2) | 148 |
| O7—H7B $\cdots$ O2 <sup>i</sup> | 0.94 | 1.87 | 2.806 (2) | 173 |

Complex 4

|                                   |      |      |           |     |
|-----------------------------------|------|------|-----------|-----|
| O6—H6 $\cdots$ O4 <sup>i</sup>    | 0.82 | 1.83 | 2.643 (3) | 173 |
| O9—H9A $\cdots$ O4 <sup>ii</sup>  | 0.82 | 2.07 | 2.799 (2) | 148 |
| O9—H9B $\cdots$ O8 <sup>iii</sup> | 0.82 | 1.83 | 2.645 (2) | 171 |

Symmetry codes: For complex 1 (i)  $-x+1/2, -y+1/2, -z+1$ ; (ii)  $-x, y, -z+1/2$ ; For complex 2:

(i)  $x, y, z-1$ ; For complex 4: (i)  $x, y+1, z$ ; (ii)  $-x+1, -y, -z+1$ ; (iii)  $x-1, y, z$ .

**Table S5** LOD calculations for  $\text{Cr}_2\text{O}_7^{2-}$  and  $\text{CrO}_4^{2-}$

|                        | Blank | Complex 2                    |                     | Complex 4                    |                     |
|------------------------|-------|------------------------------|---------------------|------------------------------|---------------------|
|                        |       | $\text{Cr}_2\text{O}_7^{2-}$ | $\text{CrO}_4^{2-}$ | $\text{Cr}_2\text{O}_7^{2-}$ | $\text{CrO}_4^{2-}$ |
| Fluorescence Intensity | 1     | 6493                         | 6495                | 1243                         | 1274                |
|                        | 2     | 6473                         | 6467                | 1226                         | 1261                |
|                        | 3     | 6433                         | 6429                | 1245                         | 1277                |



|                                 |   |                            |                            |                            |                           |
|---------------------------------|---|----------------------------|----------------------------|----------------------------|---------------------------|
|                                 | 4 | 6467                       | 6464                       | 1227                       | 1262                      |
|                                 | 5 | 6437                       | 6437                       | 1237                       | 1265                      |
| Standard deviation ( $\sigma$ ) |   | 22.64                      | 23.53                      | 7.88                       | 6.49                      |
| Slope (m)                       |   | 39.23 $\mu$ M              | 22.63 $\mu$ M              | 7.76 $\mu$ M               | 3.65 $\mu$ M              |
| Detection limit ( $3\sigma/m$ ) |   | 1.73 $\mu$ M<br>(0.508ppm) | 3.12 $\mu$ M<br>(0.605ppm) | 3.04 $\mu$ M<br>(0.890ppm) | 5.33 $\mu$ M<br>(1.03ppm) |

## References

- S1. Lv, R.; Wang, J.; Zhang, Y.; Li, H.; Yang, L.; Liao, S.; Gu, W.; Liu, X. *J. Mater. Chem. A* 2016, **4**, 15494–15500.
- S2. C-S. Cao, H.-C. Hu, H. Xu, W.-Z. Qiao, and B. Zhao, *CrystEngComm*, 2016, **18**, 4445.
- S3. R. Lv, J. Wang, Y. Zhang, H. Li, L. Yang, S. Liao, W. Gu and X. Liu. *J. Mater. Chem. A*, 2016, **4**, 15494-15500
- S4. Z. Sun, M. Yang, Y. Ma and L. Li, *Cryst. Growth.Des.*, 2017, **17**, 4326.
- S5. D. D. Yang, L. P. Lu, M. L. Zhu, *Dalton Trans.*, 2019, **48**, 10220-10234.
- S6. W. J. Gong, R. Yao, H. X. Li, Z. G. Ren, J. G. Zhang and J. P. Lang, *Dalton Trans.*, 2017, **46**, 16861.
- S7. Li, S. D.; Lu, L. P.; Zhu, M. L.; Feng, S. S.; Su, F.; Zhao, X. F. *CrystEngComm* 2018, **20**, 5442-5456.
- S8. B. Parmar, Y. Rachuri, K.K. Bisht, R. Laiya, and E. Suresh, *Inorg. Chem.*, 2017, **56**, 2627.
